# Supplementary material
Source: publisher figshare collection journal article supplement (https://acs.figshare.com/ndownloader/files/7534567)
Supplement: Supplementary file 1 [file 7534567]

 
data_shelxl
 
_audit_creation_method            SHELXL-97
_chemical_name_systematic
;
 ?
;
_chemical_name_common             ?
_chemical_melting_point           ?
_chemical_formula_moiety          'C14 H8 N4, 2(C6 H6 B Br0.40 Cl0.60 O2)'
_chemical_formula_sum
 'C26 H20 B2 Br0.80 Cl1.20 N4 O4'
_chemical_formula_weight          580.56
 
loop_
 _atom_type_symbol
 _atom_type_description
 _atom_type_scat_dispersion_real
 _atom_type_scat_dispersion_imag
 _atom_type_scat_source
 'C'  'C'   0.0030   0.0020
 'International Tables Vol C Tables 4.2.6.8 and 6.1.1.4'
 'H'  'H'   0.0000   0.0000
 'International Tables Vol C Tables 4.2.6.8 and 6.1.1.4'
 'B'  'B'   0.0010   0.0010
 'International Tables Vol C Tables 4.2.6.8 and 6.1.1.4'
 'N'  'N'   0.0060   0.0030
 'International Tables Vol C Tables 4.2.6.8 and 6.1.1.4'
 'O'  'O'   0.0110   0.0060
 'International Tables Vol C Tables 4.2.6.8 and 6.1.1.4'
 'Cl'  'Cl'   0.1480   0.1590
 'International Tables Vol C Tables 4.2.6.8 and 6.1.1.4'
 'Br'  'Br'  -0.2900   2.4600
 'International Tables Vol C Tables 4.2.6.8 and 6.1.1.4'
 
_symmetry_cell_setting            'Triclinic'
_symmetry_space_group_name_H-M    'P -1'
_symmetry_space_group_name_Hall   '-P 1'
 
loop_
 _symmetry_equiv_pos_as_xyz
 'x, y, z'
 '-x, -y, -z'
 
_cell_length_a                    6.7970(3)
_cell_length_b                    9.8020(5)
_cell_length_c                    10.6491(6)
_cell_angle_alpha                 113.714(5)
_cell_angle_beta                  93.663(4)
_cell_angle_gamma                 96.856(4)
_cell_volume                      640.03(6)
_cell_formula_units_Z             1
_cell_measurement_temperature     293(2)
_cell_measurement_reflns_used   4162
_cell_measurement_theta_min     3.4700
_cell_measurement_theta_max     27.7710
 
_exptl_crystal_description        'prism'
_exptl_crystal_colour             'purple'
_exptl_crystal_size_max           0.60
_exptl_crystal_size_mid           0.42
_exptl_crystal_size_min           0.16
_exptl_crystal_density_meas       ?
_exptl_crystal_density_diffrn     1.506
_exptl_crystal_density_method     'not measured'
_exptl_crystal_F_000              294
_exptl_absorpt_coefficient_mu     1.460
_exptl_absorpt_correction_type    'analytical'
_exptl_absorpt_correction_T_min   0.4745
_exptl_absorpt_correction_T_max   0.7999
_exptl_absorpt_process_details    
;
CrysAlisPro, Agilent Technologies,
Version 1.171.37.34 (release 22-05-2014 CrysAlis171 .NET)
(compiled May 22 2014,16:03:01)
Analytical numeric absorption correction using a multifaceted crystal
			model based on expressions derived by R.C. Clark & J.S. Reid.
(Clark, R. C. & Reid, J. S. (1995). Acta Cryst. A51, 887-897)
Empirical absorption correction using spherical harmonics,
 implemented in SCALE3 ABSPACK scaling algorithm.
;
_exptl_special_details
;
 ?
;
 
_diffrn_ambient_temperature       293(2)
_diffrn_radiation_wavelength      0.71073
_diffrn_radiation_type            MoK\a
_diffrn_radiation_source          'fine-focus sealed tube'
_diffrn_measurement_device 'four-circle diffractometer'
_diffrn_measurement_device_type 'Xcalibur, Ruby, Gemini ultra'
_diffrn_detector 'CCD plate'
_diffrn_detector_type 'Ruby'
_diffrn_detector_area_resol_mean 5.1856
_diffrn_measurement_method        '\w scans'
_diffrn_standards_number          ?
_diffrn_standards_interval_count  ?
_diffrn_standards_interval_time   ?
_diffrn_standards_decay_%         ?
_diffrn_reflns_number             9027
_diffrn_reflns_av_R_equivalents   0.0273
_diffrn_reflns_av_sigmaI/netI     0.0241
_diffrn_reflns_limit_h_min        -8
_diffrn_reflns_limit_h_max        8
_diffrn_reflns_limit_k_min        -11
_diffrn_reflns_limit_k_max        11
_diffrn_reflns_limit_l_min        -12
_diffrn_reflns_limit_l_max        12
_diffrn_reflns_theta_min          3.04
_diffrn_reflns_theta_max          25.03
_reflns_number_total              2256
_reflns_number_gt                 1929
_reflns_threshold_expression      >2sigma(I)
 
_computing_data_collection
;
CrysAlisPro, Agilent Technologies,
Version 1.171.37.34 (release 22-05-2014 CrysAlis171 .NET)
(compiled May 22 2014,16:03:01)
;
_computing_cell_refinement
;
CrysAlisPro, Agilent Technologies,
Version 1.171.37.34 (release 22-05-2014 CrysAlis171 .NET)
(compiled May 22 2014,16:03:01)
;
_computing_data_reduction
;
CrysAlisPro, Agilent Technologies,
Version 1.171.37.34 (release 22-05-2014 CrysAlis171 .NET)
(compiled May 22 2014,16:03:01)
;
_computing_structure_solution     'Sir2011'
_computing_structure_refinement   'SHELXL-97 (Sheldrick, 1997)'
_computing_molecular_graphics     ?
_computing_publication_material   ?
 
_refine_special_details
;
 Refinement of F^2^ against ALL reflections.  The weighted R-factor wR and
 goodness of fit S are based on F^2^, conventional R-factors R are based
 on F, with F set to zero for negative F^2^. The threshold expression of
 F^2^ > 2sigma(F^2^) is used only for calculating R-factors(gt) etc. and is
 not relevant to the choice of reflections for refinement.  R-factors based
 on F^2^ are statistically about twice as large as those based on F, and R-
 factors based on ALL data will be even larger.
;
 
_refine_ls_structure_factor_coef  Fsqd
_refine_ls_matrix_type            full
_refine_ls_weighting_scheme       calc
_refine_ls_weighting_details
 'calc w=1/[\s^2^(Fo^2^)+(0.0458P)^2^+0.1151P] where P=(Fo^2^+2Fc^2^)/3'
_atom_sites_solution_primary      direct
_atom_sites_solution_secondary    difmap
_atom_sites_solution_hydrogens    geom
_refine_ls_hydrogen_treatment     mixed
_refine_ls_extinction_method      none
_refine_ls_extinction_coef        ?
_refine_ls_number_reflns          2256
_refine_ls_number_parameters      189
_refine_ls_number_restraints      1
_refine_ls_R_factor_all           0.0405
_refine_ls_R_factor_gt            0.0319
_refine_ls_wR_factor_ref          0.0897
_refine_ls_wR_factor_gt           0.0857
_refine_ls_goodness_of_fit_ref    1.098
_refine_ls_restrained_S_all       1.098
_refine_ls_shift/su_max           0.001
_refine_ls_shift/su_mean          0.000
 
loop_
 _atom_site_label
 _atom_site_type_symbol
 _atom_site_fract_x
 _atom_site_fract_y
 _atom_site_fract_z
 _atom_site_U_iso_or_equiv
 _atom_site_adp_type
 _atom_site_occupancy
 _atom_site_symmetry_multiplicity
 _atom_site_calc_flag
 _atom_site_refinement_flags
 _atom_site_disorder_assembly
 _atom_site_disorder_group
C1 C 0.8258(3) 0.3028(2) 0.4693(2) 0.0420(5) Uani 1 1 d . A .
C2 C 0.8711(3) 0.2301(3) 0.3357(2) 0.0492(5) Uani 1 1 d . . .
H2 H 0.9983 0.2052 0.3227 0.059 Uiso 1 1 calc R . .
C3 C 0.7335(3) 0.1932(3) 0.2212(2) 0.0521(5) Uani 1 1 d . A .
H3 H 0.7671 0.1442 0.1325 0.063 Uiso 1 1 calc R . .
C4 C 0.5460(3) 0.2305(2) 0.2417(2) 0.0471(5) Uani 1 1 d . . .
C5 C 0.4932(3) 0.3021(3) 0.3714(2) 0.0528(5) Uani 1 1 d . A .
H5 H 0.3654 0.3262 0.3835 0.063 Uiso 1 1 calc R . .
C6 C 0.6346(3) 0.3380(3) 0.4844(2) 0.0502(5) Uani 1 1 d . . .
H6 H 0.6000 0.3871 0.5729 0.060 Uiso 1 1 calc R A .
B1 B 0.9829(3) 0.3449(3) 0.5988(2) 0.0445(5) Uani 1 1 d . . .
O1 O 0.9439(2) 0.44526(18) 0.72243(15) 0.0553(4) Uani 1 1 d D A .
O2 O 1.1485(2) 0.2783(2) 0.58115(16) 0.0627(5) Uani 1 1 d . A .
H2O H 1.238(5) 0.305(4) 0.666(3) 0.112(11) Uiso 1 1 d . . .
H1O H 1.040(3) 0.465(3) 0.782(2) 0.089(9) Uiso 1 1 d D . .
Cl1 Cl 0.3581(15) 0.1699(17) 0.0851(12) 0.0619(19) Uani 0.60 1 d P A 1
Br1 Br 0.3562(9) 0.1884(11) 0.0950(7) 0.0588(8) Uani 0.40 1 d P A 2
C7 C 0.7432(3) 0.3339(2) 0.9387(2) 0.0423(5) Uani 1 1 d . . .
C8 C 0.9090(3) 0.2560(3) 0.9277(2) 0.0519(5) Uani 1 1 d . . .
H8 H 1.0125 0.2915 0.9999 0.062 Uiso 1 1 calc R . .
C9 C 0.9170(3) 0.1311(3) 0.8133(3) 0.0579(6) Uani 1 1 d . . .
H9 H 1.0273 0.0819 0.8069 0.070 Uiso 1 1 calc R . .
C10 C 0.7583(4) 0.0727(3) 0.7012(2) 0.0591(6) Uani 1 1 d . . .
H10 H 0.7660 -0.0147 0.6237 0.071 Uiso 1 1 calc R . .
C11 C 0.5982(3) 0.1427(3) 0.7068(2) 0.0536(6) Uani 1 1 d . . .
H11 H 0.4964 0.1033 0.6333 0.064 Uiso 1 1 calc R . .
C12 C 0.5835(3) 0.2767(2) 0.8244(2) 0.0427(5) Uani 1 1 d . . .
C13 C 0.5780(3) 0.5280(2) 1.05657(19) 0.0405(5) Uani 1 1 d . . .
N1 N 0.4269(2) 0.34727(19) 0.82798(16) 0.0437(4) Uani 1 1 d . . .
N2 N 0.7385(2) 0.45776(19) 1.05206(16) 0.0429(4) Uani 1 1 d . . .
 
loop_
 _atom_site_aniso_label
 _atom_site_aniso_U_11
 _atom_site_aniso_U_22
 _atom_site_aniso_U_33
 _atom_site_aniso_U_23
 _atom_site_aniso_U_13
 _atom_site_aniso_U_12
C1 0.0413(10) 0.0442(12) 0.0385(11) 0.0162(9) -0.0004(8) 0.0055(9)
C2 0.0411(11) 0.0605(14) 0.0414(11) 0.0156(10) 0.0009(9) 0.0127(10)
C3 0.0512(12) 0.0648(15) 0.0349(11) 0.0154(10) 0.0012(9) 0.0102(10)
C4 0.0447(11) 0.0523(13) 0.0423(12) 0.0214(10) -0.0089(9) 0.0010(9)
C5 0.0403(11) 0.0645(15) 0.0518(13) 0.0220(11) 0.0010(9) 0.0118(10)
C6 0.0479(12) 0.0598(14) 0.0360(11) 0.0127(10) 0.0017(9) 0.0105(10)
B1 0.0438(12) 0.0502(14) 0.0365(12) 0.0165(11) 0.0013(10) 0.0031(10)
O1 0.0519(9) 0.0627(10) 0.0393(8) 0.0103(8) -0.0066(7) 0.0103(7)
O2 0.0489(9) 0.0902(12) 0.0397(8) 0.0151(8) -0.0042(7) 0.0239(8)
Cl1 0.059(3) 0.068(2) 0.047(2) 0.0207(12) -0.0273(17) -0.0021(14)
Br1 0.0499(13) 0.081(3) 0.0452(11) 0.0306(17) -0.0148(9) 0.0040(10)
C7 0.0413(10) 0.0483(12) 0.0369(11) 0.0185(10) -0.0005(8) 0.0046(9)
C8 0.0468(11) 0.0577(14) 0.0496(13) 0.0213(12) -0.0035(9) 0.0105(10)
C9 0.0573(13) 0.0569(14) 0.0601(14) 0.0227(12) 0.0036(11) 0.0184(11)
C10 0.0690(15) 0.0488(14) 0.0528(14) 0.0129(11) 0.0065(11) 0.0146(11)
C11 0.0551(12) 0.0534(13) 0.0416(12) 0.0112(10) -0.0043(10) 0.0055(10)
C12 0.0416(10) 0.0473(12) 0.0362(10) 0.0158(9) -0.0006(8) 0.0043(9)
C13 0.0375(10) 0.0488(12) 0.0329(10) 0.0167(9) -0.0025(8) 0.0027(9)
N1 0.0414(9) 0.0503(10) 0.0327(9) 0.0123(8) -0.0047(7) 0.0052(8)
N2 0.0388(9) 0.0498(10) 0.0357(9) 0.0150(8) -0.0051(7) 0.0058(7)
 
_geom_special_details
;
 All esds (except the esd in the dihedral angle between two l.s. planes)
 are estimated using the full covariance matrix.  The cell esds are taken
 into account individually in the estimation of esds in distances, angles
 and torsion angles; correlations between esds in cell parameters are only
 used when they are defined by crystal symmetry.  An approximate (isotropic)
 treatment of cell esds is used for estimating esds involving l.s. planes.
;
 
loop_
 _geom_bond_atom_site_label_1
 _geom_bond_atom_site_label_2
 _geom_bond_distance
 _geom_bond_site_symmetry_2
 _geom_bond_publ_flag
C1 C2 1.385(3) . ?
C1 C6 1.387(3) . ?
C1 B1 1.569(3) . ?
C2 C3 1.382(3) . ?
C2 H2 0.9300 . ?
C3 C4 1.374(3) . ?
C3 H3 0.9300 . ?
C4 C5 1.369(3) . ?
C4 Br1 1.836(7) . ?
C4 Cl1 1.875(10) . ?
C5 C6 1.388(3) . ?
C5 H5 0.9300 . ?
C6 H6 0.9300 . ?
B1 O2 1.354(3) . ?
B1 O1 1.355(3) . ?
O1 H1O 0.8302(11) . ?
O2 H2O 0.98(3) . ?
C7 N2 1.330(3) . ?
C7 C8 1.420(3) . ?
C7 C12 1.453(3) . ?
C8 C9 1.346(3) . ?
C8 H8 0.9300 . ?
C9 C10 1.433(3) . ?
C9 H9 0.9300 . ?
C10 C11 1.347(3) . ?
C10 H10 0.9300 . ?
C11 C12 1.423(3) . ?
C11 H11 0.9300 . ?
C12 N1 1.331(2) . ?
C13 N1 1.347(3) 2_667 ?
C13 N2 1.351(2) . ?
C13 C13 1.430(4) 2_667 ?
N1 C13 1.347(3) 2_667 ?
 
loop_
 _geom_angle_atom_site_label_1
 _geom_angle_atom_site_label_2
 _geom_angle_atom_site_label_3
 _geom_angle
 _geom_angle_site_symmetry_1
 _geom_angle_site_symmetry_3
 _geom_angle_publ_flag
C2 C1 C6 117.13(18) . . ?
C2 C1 B1 121.96(17) . . ?
C6 C1 B1 120.92(18) . . ?
C3 C2 C1 122.22(18) . . ?
C3 C2 H2 118.9 . . ?
C1 C2 H2 118.9 . . ?
C4 C3 C2 118.44(19) . . ?
C4 C3 H3 120.8 . . ?
C2 C3 H3 120.8 . . ?
C5 C4 C3 121.77(18) . . ?
C5 C4 Br1 117.1(3) . . ?
C3 C4 Br1 121.1(3) . . ?
C5 C4 Cl1 120.6(4) . . ?
C3 C4 Cl1 117.6(4) . . ?
Br1 C4 Cl1 5.2(8) . . ?
C4 C5 C6 118.50(19) . . ?
C4 C5 H5 120.7 . . ?
C6 C5 H5 120.7 . . ?
C5 C6 C1 121.94(19) . . ?
C5 C6 H6 119.0 . . ?
C1 C6 H6 119.0 . . ?
O2 B1 O1 123.73(18) . . ?
O2 B1 C1 118.34(18) . . ?
O1 B1 C1 117.93(18) . . ?
B1 O1 H1O 110(2) . . ?
B1 O2 H2O 114.7(18) . . ?
N2 C7 C8 119.50(17) . . ?
N2 C7 C12 121.60(17) . . ?
C8 C7 C12 118.90(19) . . ?
C9 C8 C7 120.3(2) . . ?
C9 C8 H8 119.8 . . ?
C7 C8 H8 119.8 . . ?
C8 C9 C10 121.0(2) . . ?
C8 C9 H9 119.5 . . ?
C10 C9 H9 119.5 . . ?
C11 C10 C9 120.8(2) . . ?
C11 C10 H10 119.6 . . ?
C9 C10 H10 119.6 . . ?
C10 C11 C12 120.6(2) . . ?
C10 C11 H11 119.7 . . ?
C12 C11 H11 119.7 . . ?
N1 C12 C11 120.25(18) . . ?
N1 C12 C7 121.35(18) . . ?
C11 C12 C7 118.40(18) . . ?
N1 C13 N2 116.84(16) 2_667 . ?
N1 C13 C13 122.0(2) 2_667 2_667 ?
N2 C13 C13 121.2(2) . 2_667 ?
C12 N1 C13 116.85(16) . 2_667 ?
C7 N2 C13 117.02(16) . . ?
 
_diffrn_measured_fraction_theta_max    0.997
_diffrn_reflns_theta_full              25.00
_diffrn_measured_fraction_theta_full   0.997
_refine_diff_density_max    0.188
_refine_diff_density_min   -0.151
_refine_diff_density_rms    0.036
_iucr_refine_instructions_details 
;
TITL BN_BIRGE-7-062-ABC in P-1
CELL  0.71073   6.7970   9.8020  10.6491  113.714   93.663   96.856
ZERR     1.00   0.0003   0.0005   0.0006    0.005    0.004    0.004
LATT   1
SFAC  C        2.31000 20.84392  1.02000 10.20751   1.58860   0.56870 =
         0.86500  51.65125   0.21560   0.003   0.002    11.500   0.770  12.011
SFAC  H        0.49300 10.51091  0.32291 26.12573   0.14019   3.14236 =
         0.04081  57.79977   0.00304   0.000   0.000     0.620   0.320   1.008
SFAC  B        2.05450 23.21852  1.33260  1.02100   1.09790  60.34987 =
         0.70680   0.14030  -0.19320   0.001   0.001     6.610   0.880  10.811
SFAC  N       12.21261  0.00570  3.13220  9.89331   2.01250  28.99754 =
         1.16630   0.58260 -11.52901   0.006   0.003    19.600   0.700  14.007
SFAC  O        3.04850 13.27711  2.28680  5.70111   1.54630   0.32390 =
         0.86700  32.90894   0.25080   0.011   0.006    32.500   0.660  15.999
SFAC  CL      11.46041  0.01040  7.19641  1.16620   6.25561  18.51942 =
         1.64550  47.77846  -9.55741   0.148   0.159   678.000   0.990  35.453
SFAC  BR      17.17892  2.17230  5.23581 16.57962   5.63771   0.26090 =
         3.98510  41.43285   2.95570  -0.290   2.460 10000.000   1.140  79.904
UNIT  26   20    2    4    4    1.2    0.8
MERG   2
shel 99 0.84
FMAP   2
PLAN   10
ACTA    50.00
BOND   $H
L.S.  10
temp 20
DFIX 0.83 0.001 O1 H1O
size 0.16 0.42 0.60
TEMP    20.00
WGHT    0.045800    0.115100
FVAR      14.06319
C1    1    0.825797    0.302835    0.469303    11.00000    0.04130    0.04416 =
         0.03849    0.01616   -0.00039    0.00551
C2    1    0.871055    0.230074    0.335731    11.00000    0.04111    0.06049 =
         0.04139    0.01565    0.00086    0.01267
AFIX  43
H2    2    0.998279    0.205222    0.322658    11.00000   -1.20000
AFIX   0
C3    1    0.733544    0.193169    0.221247    11.00000    0.05121    0.06476 =
         0.03488    0.01538    0.00121    0.01023
AFIX  43
H3    2    0.767113    0.144213    0.132471    11.00000   -1.20000
AFIX   0
C4    1    0.546000    0.230517    0.241672    11.00000    0.04467    0.05235 =
         0.04232    0.02144   -0.00895    0.00100
C5    1    0.493172    0.302143    0.371360    11.00000    0.04032    0.06454 =
         0.05185    0.02196    0.00104    0.01183
AFIX  43
H5    2    0.365441    0.326228    0.383487    11.00000   -1.20000
AFIX   0
C6    1    0.634567    0.338044    0.484420    11.00000    0.04793    0.05976 =
         0.03601    0.01267    0.00170    0.01053
AFIX  43
H6    2    0.600034    0.387147    0.572893    11.00000   -1.20000
AFIX   0
B1    3    0.982887    0.344929    0.598808    11.00000    0.04376    0.05020 =
         0.03654    0.01649    0.00130    0.00314
O1    5    0.943892    0.445261    0.722431    11.00000    0.05188    0.06267 =
         0.03934    0.01029   -0.00659    0.01034
O2    5    1.148533    0.278337    0.581147    11.00000    0.04891    0.09019 =
         0.03965    0.01511   -0.00421    0.02389
H2O   2    1.238174    0.305370    0.666144    11.00000    0.11181
H1O   2    1.040129    0.465073    0.782341    11.00000    0.08938
PART    1
CL1   6    0.358102    0.169871    0.085061    10.60000    0.05916    0.06801 =
         0.04733    0.02067   -0.02731   -0.00214
PART    2
BR1   7    0.356207    0.188425    0.095033    10.40000    0.04987    0.08104 =
         0.04522    0.03063   -0.01475    0.00403
PART    0
C7    1    0.743204    0.333860    0.938670    11.00000    0.04125    0.04831 =
         0.03692    0.01852   -0.00045    0.00460
C8    1    0.908981    0.255972    0.927695    11.00000    0.04677    0.05767 =
         0.04965    0.02130   -0.00348    0.01054
AFIX  43
H8    2    1.012500    0.291457    0.999922    11.00000   -1.20000
AFIX   0
C9    1    0.917010    0.131077    0.813298    11.00000    0.05733    0.05685 =
         0.06011    0.02265    0.00355    0.01843
AFIX  43
H9    2    1.027257    0.081891    0.806862    11.00000   -1.20000
AFIX   0
C10   1    0.758310    0.072653    0.701201    11.00000    0.06901    0.04883 =
         0.05278    0.01286    0.00650    0.01463
AFIX  43
H10   2    0.766004   -0.014677    0.623669    11.00000   -1.20000
AFIX   0
C11   1    0.598187    0.142746    0.706842    11.00000    0.05510    0.05335 =
         0.04164    0.01119   -0.00427    0.00553
AFIX  43
H11   2    0.496379    0.103315    0.633308    11.00000   -1.20000
AFIX   0
C12   1    0.583466    0.276659    0.824396    11.00000    0.04158    0.04732 =
         0.03622    0.01583   -0.00063    0.00425
C13   1    0.578047    0.528008    1.056565    11.00000    0.03754    0.04884 =
         0.03293    0.01669   -0.00250    0.00268
N1    4    0.426932    0.347273    0.827982    11.00000    0.04142    0.05034 =
         0.03270    0.01230   -0.00475    0.00515
N2    4    0.738509    0.457762    1.052058    11.00000    0.03878    0.04983 =
         0.03567    0.01500   -0.00513    0.00580
 
HKLF    4
 
REM  BN_BIRGE-7-062-ABC in P-1
REM R1 =  0.0319 for   1929 Fo > 4sig(Fo)  and  0.0405 for all   2256 data
REM    189 parameters refined using      1 restraints
 
END
 
WGHT      0.0461      0.1256
REM Highest difference peak  0.188,  deepest hole -0.151,  1-sigma level  0.036
Q1    1   0.3674  0.2794  0.1592  11.00000  0.05    0.19
Q2    1   0.3052  0.1069  0.0926  11.00000  0.05    0.19
Q3    1   0.4510  0.1728  0.1263  11.00000  0.05    0.16
Q4    1   0.9275  0.3600  0.5185  11.00000  0.05    0.14
Q5    1   0.8384  0.4696  1.1244  11.00000  0.05    0.12
Q6    1   0.8166  0.1983  0.4051  11.00000  0.05    0.12
Q7    1   0.4789  0.2538  0.0693  11.00000  0.05    0.12
Q8    1   1.0575  0.4973  0.6779  11.00000  0.05    0.12
Q9    1   0.5456  0.3332  0.2985  11.00000  0.05    0.11
Q10   1   1.0879  0.1174  0.7834  11.00000  0.05    0.11
;
